# Supplementary material for: Functional Passenger-Strand miRNAs in Exosomes Derived from Human Colon Cancer Cells and Their Heterogeneous Paracrine Effects
Source: PubMed Central journal article supplement (PMC7053335; doi:10.7150/ijbs.40787), 2020-02-04
Supplement: ijbsv16p1044s1.pdf [file ijbsv16p1044s1.pdf]

**Table S1. Patients Characteristics**

| <b>Characteristics</b>     | <b>Colorectal cancer (n=20)</b> |
|----------------------------|---------------------------------|
| <b>Gender</b>              |                                 |
| Male                       | 12                              |
| Female                     | 8                               |
| <b>Age at diagnosis</b>    |                                 |
| Mean±SD                    | 60±12                           |
| Median (range)             | 56 (32-81)                      |
| <b>Clinical stage</b>      |                                 |
| I                          | 4                               |
| II                         | 11                              |
| III                        | 5                               |
| <b>Nodal status</b>        |                                 |
| Positive                   | 12                              |
| Negative                   | 8                               |
| <b>Tumor location</b>      |                                 |
| Rectum                     | 10                              |
| Distal colon               | 4                               |
| Proximal colon             | 6                               |
| <b>Histology</b>           |                                 |
| Adenocarcinoma             | 15                              |
| Mucous adenocarcinoma      | 5                               |
| signet-ring cell carcinoma | 0                               |

**Supplementary Table S2: Primers for miRNA\* RT-qPCR**

| miR_name          | Forward primer          | Reverse primer           |
|-------------------|-------------------------|--------------------------|
| hsa-miR-425-3p    | gcatcgggaatgcgtgt       | agtttttttttttttggcgga    |
| hsa-miR-2277-3p   | cagcgcctgcct            | agtttttttttttttcgagcca   |
| hsa-miR-1247-3p   | cgggaacgtcgagac         | ccagtttttttttttctcca     |
| hsa-miR-505-5p    | ggggagccaggaagt         | gtccagtttttttttttaacatca |
| hsa-miR-642a-3p   | gcagagacacattggagag     | ggccagtttttttttttgttc    |
| hsa-miR-766-5p    | cagaggaggaattggtgct     | ggccagtttttttttttagac    |
| hsa-miR-664a-5p   | cagactgctagggaaaatg     | gtccagtttttttttttccaatc  |
| hsa-miR-877-5p    | gtagaggagatggcgca       | ggccagtttttttttttgttc    |
| hsa-miR-10a-3p    | gcgcagcaaatcgtatc       | ggccagtttttttttttatcc    |
| hsa-miR-7854-3p   | gaggtgaccgcagatg        | ggccagtttttttttttcttc    |
| hsa-miR-10b-3p    | cgccagcagattcgattc      | ggccagtttttttttttatcc    |
| hsa-miR-191-3p    | ctgcgcttgatttcgt        | ccagtttttttttttgggga     |
| hsa-miR-466-5p    | cagtgtgtgcatgtgtg       | ggccagttttttttttatatac   |
| hsa-miR-6720-5p   | agttccagccctgtag        | cagtttttttttttttacgcgg   |
| hsa-miR-219a-1-3p | gcagagagttgagtctggac    | ccagttttttttttttacggga   |
| hsa-miR-550a-3-5p | gagtgctgaggaggt         | ggccagtttttttttttctct    |
| hsa-miR-4796-3p   | cgcagtaaatggcagagt      | ggccagtttttttttttgttc    |
| hsa-miR-628-3p    | gcagttctagtaagagtggca   | gtccagtttttttttttcgac    |
| hsa-miR-1304-3p   | gcagtctcactgtagcatc     | cagttttttttttttggggttc   |
| hsa-miR-29c-5p    | accgatttctcctgggtg      | ggccagtttttttttttctga    |
| hsa-miR-556-3p    | gcgcagatattaccattagctc  | ggccagtttttttttttaagatg  |
| hsa-miR-627-3p    | gcagctcttttttgagactc    | ggccagtttttttttttagtg    |
| hsa-miR-98-3p     | gcgcagctatacaactactac   | ggccagtttttttttttagga    |
| hsa-miR-548a-5p   | gcagaaaagtaattgcggtct   | ggccagtttttttttttacc     |
| hsa-miR-10399-5p  | gcgcagaattacagattgct    | gtccagtttttttttttctga    |
| hsa-miR-33a-5p    | cgagggtcattgtagt        | gtccagtttttttttttgaat    |
| hsa-miR-15b-3p    | cgccagcgaatcattattgc    | aggccagtttttttttttagag   |
| hsa-miR-2467-5p   | gtgaggctctgttagcctt     | ccagtttttttttttagacca    |
| hsa-miR-548aa     | cgcaaaaaccacaactactttg  | gtccagtttttttttttgtgc    |
| hsa-miR-31-3p     | gtgctatgccacaatattgc    | ggccagtttttttttttgatg    |
| hsa-miR-23b-5p    | gggttctgcatgct          | caggccagtttttttttttaaac  |
| hsa-miR-548ae-5p  | cgcaaaaagtaattgtggt     | tccagttttttttttttggca    |
| hsa-miR-26b-3p    | cagcctgtctccattactg     | gtccagtttttttttttgagc    |
| hsa-miR-454-3p    | cgccagtagtccaatattgct   | gtccagtttttttttttaacct   |
| hsa-miR-10399-3p  | gtctctcgacaagctgt       | ggccagtttttttttttaacct   |
| hsa-miR-29a-3p    | cgccagtagcaccatctga     | tccagtttttttttttaaccga   |
| hsa-miR-10401-3p  | aggacctcgcctgc          | gtccagtttttttttttggc     |
| hsa-miR-577       | gcgcaggtagataaaatattggt | ggccagtttttttttttcag     |

**Supplementary Table S4:** miRNAs set of higher level in the exosomes and higher level inside the cells (SW620 vs. NCM460, Exo|Cell).

| High in exosome and high in cell (HEHC) |                         |         |                                       |                   |                        |                     |               |              |              |             |                  |
|-----------------------------------------|-------------------------|---------|---------------------------------------|-------------------|------------------------|---------------------|---------------|--------------|--------------|-------------|------------------|
| miR_name                                | miR_seq                 | up/down | fold_change(SW_620/NCM_460)(Exo Cell) | log2(fold_change) | pvalue(chi_square_2x2) | pvalue(fisher_test) | NCM_460(norm) | SW_620(norm) | NCM_460(raw) | SW_620(raw) | Expression level |
| hsa-miR-425-3p_L+1R-1[81] *             | CATCGGGAATGTCGTGTCCGCC  | up up   | 2.82 3.20                             | 1.49 1.68         | 1.25E-74 1.52E-76      | 2.57E-76 1.20E-78   | 280 213       | 789 682      | 72 392       | 509 1,505   | middle middle    |
| hsa-miR-2277-3p_R+1 *                   | TGACAGCGCCCTGCCTGGCTCG  | up up   | inf 11.72                             | inf 3.55          | 1.95E-05 9.25E-38      | 3.95E-06 7.81E-42   | 0 15          | 16 172       | 0 27         | 10 380      | middle middle    |
| hsa-miR-1247-3p_L-3 <sup>[82]</sup> *   | CGGGAACGTCGAGACTGGAGC   | up up   | inf 2.65                              | inf 1.41          | 2.89E-06 1.06E-02      | 3.83E-07 1.64E-02   | 0 6           | 19 16        | 0 11         | 12 35       | middle middle    |
| hsa-miR-505-5p_R+1 <sup>[83]</sup> *    | GGGAGCCAGGAAGTATTGATGTT | up up   | inf 4.95                              | inf 2.31          | 5.25E-18 1.75E-08      | 2.44E-22 5.97E-09   | 0 9           | 64 46        | 0 17         | 41 101      | middle middle    |
| hsa-miR-1343-3p                         | CTCCTGGGGCCCGCACTCTCGC  | up up   | inf 2.41                              | inf 1.27          | 2.53E-03 2.43E-08      | 1.99E-03 2.04E-08   | 0 35          | 8 85         | 0 65         | 5 188       | middle middle    |
| hsa-miR-628-5p <sup>[84, 85]</sup>      | ATGCTGACATATTACTAGAGG   | up up   | inf 2.04                              | inf 1.03          | 6.58E-08 2.20E-06      | 3.61E-09 2.80E-06   | 0 39          | 25 79        | 0 71         | 16 174      | middle middle    |
| hsa-miR-642a-3p_R-1 <sup>[86]</sup> *   | AGACACATTTGGAGAGGGAAC   | up up   | inf inf                               | inf inf           | 5.25E-18 1.38E-12      | 2.44E-22 3.85E-15   | 0 0           | 64 42        | 0 0          | 41 92       | middle middle    |
| hsa-miR-766-5p_R-1 <sup>[87]</sup> *    | AGGAGGAATTGGTGCTGGTCT   | up up   | inf inf                               | inf inf           | 3.53E-04 1.95E-02      | 1.93E-04 1.92E-02   | 0 0           | 11 5         | 0 0          | 7 10        | middle middle    |
| hsa-miR-664a-5p_R-2 <sup>[88]</sup> *   | ACTGGCTAGGGAAAATGATTGG  | up up   | inf inf                               | inf inf           | 1.35E-15 1.69E-06      | 5.81E-19 3.01E-07   | 0 0           | 54 19        | 0 0          | 35 42       | middle middle    |
| hsa-miR-877-5p_R+3 <sup>[89]</sup> *    | GTAGAGGAGATGGCGCAGGGGAC | up up   | inf 2.59                              | inf 1.37          | 4.17E-53 7.54E-26      | 2.87E-68 6.56E-26   | 0 107         | 200 276      | 0 196        | 129 609     | middle middle    |
| hsa-miR-10a-3p_R-1                      | CAAATTCGTATCTAGGG       | up up   | 3.44 2.97                             | 1.78 1.57         | 0.00E+00 6.06E-        | 4.47E-274 3.5       | 677 198       | 2,332 589    | 174 364      | 1,504 1,3   | middle mi        |

|                                                  |                              |       |            |           |                   |                    |             |             |           |              |               |
|--------------------------------------------------|------------------------------|-------|------------|-----------|-------------------|--------------------|-------------|-------------|-----------|--------------|---------------|
| *                                                | GAAT                         |       |            |           | 62                | 6E-63              |             |             |           | 00           | ddle          |
| hsa-mir-4454-p5                                  | TCCGAGTCACGGCACC<br>AAA      | up up | 7.45 66.37 | 2.90 6.05 | 0.00E+00 0.00E+00 | 3.51E-267 0.00E+00 | 183 111     | 1,363 7,335 | 47 203    | 879 16,180   | high high     |
| hsa-miR-361-5p <sup>[90-102]</sup>               | TTATCAGAATCTCCAGG<br>GGTAC   | up up | 2.69 2.02  | 1.43 1.01 | 0.00E+00 0.00E+00 | 0.00E+00 0.00E+00  | 2,771 3,505 | 7,457 7,076 | 712 6,438 | 4,809 15,609 | high high     |
| hsa-miR-7854-3p_R+1<br>*                         | TGAGGTGACCGCAGAT<br>GGGAAG   | up up | inf inf    | inf inf   | 5.25E-18 5.20E-05 | 2.44E-22 1.57E-05  | 0 0         | 64 14       | 0 0       | 41 30        | middle middle |
| hsa-miR-98-5p <sup>[103-105]</sup>               | TGAGGTAGTAAGTTGTA<br>TTGTT   | up up | 6.28 2.04  | 2.65 1.03 | 0.00E+00 0.00E+00 | 0.00E+00 0.00E+00  | 599 4,226   | 3,764 8,633 | 154 7,762 | 2,427 19,043 | high high     |
| hsa-miR-10b-3p_L-1 <sup>[106,107]</sup><br>*     | CAGATTTCGATTCTAGGG<br>GAAT   | up up | inf inf    | inf inf   | 1.12E-06 1.05E-08 | 1.76E-07 5.42E-10  | 0 0         | 20 27       | 0 0       | 13 60        | middle middle |
| hsa-miR-425-5p <sup>[108-115]</sup>              | AATGACACGATCACTCC<br>CGTTGA  | up up | 2.67 2.50  | 1.42 1.32 | 0.00E+00 0.00E+00 | 9.89E-146 0.00E+00 | 611 2,181   | 1,630 5,443 | 157 4,006 | 1,051 12,007 | high high     |
| hsa-miR-466_R-1_1ss22<br>AC <sup>[116-119]</sup> | ATACACATACACGCAAC<br>ACACC   | up up | inf inf    | inf inf   | 1.95E-05 9.30E-06 | 3.95E-06 3.23E-06  | 0 0         | 16 16       | 0 0       | 10 36        | middle middle |
| hsa-miR-191-3p_L-1<br>*                          | CTGCGCTTGGATTTCGT<br>CCCC    | up up | inf 2.44   | inf 1.29  | 1.34E-04 8.62E-03 | 8.86E-05 1.11E-02  | 0 8         | 12 19       | 0 14      | 8 41         | middle middle |
| hsa-mir-466-p5<br>*                              | TGTGTTGCATGTGTGTAT<br>ATGT   | up up | inf inf    | inf inf   | 2.06E-24 1.72E-03 | 1.91E-30 1.80E-03  | 0 0         | 88 8        | 0 0       | 57 18        | middle middle |
| hsa-miR-664a-3p <sup>[120]</sup>                 | TATTCATTATCCCCAGC<br>CTACA   | up up | inf 3.03   | inf 1.60  | 2.57E-08 4.86E-24 | 1.66E-09 2.36E-24  | 0 71        | 26 214      | 0 130     | 17 473       | middle middle |
| hsa-miR-4286_R+1 <sup>[121]</sup>                | ACCCCACTCCTGGTACC<br>A       | up up | inf 2.68   | inf 1.42  | 3.34E-17 2.42E-35 | 5.47E-21 8.48E-36  | 0 137       | 60 368      | 0 252     | 39 812       | middle middle |
| hsa-miR-6720-5p_R+1<br>*                         | TTCCAGCCCTGGTAGGC<br>GCCGCGT | up up | inf 3.26   | inf 1.71  | 9.39E-04 9.59E-04 | 9.13E-04 1.95E-03  | 0 7         | 9 21        | 0 12      | 6 47         | middle middle |
| hsa-miR-196a-5p <sup>[36,122]</sup>              | TAGGTAGTTTCATGTTG            | up up | 5.35 2.99  | 2.42 1.58 | 0.00E+00 0.00E+00 | 0.00E+00 0.00E+00  | 699 1,823   | 3,734 5,44  | 180 3,349 | 2,408 12,    | high high     |

|                                              |                             |       |           |           |                   |                    |               |               |              |               |               |
|----------------------------------------------|-----------------------------|-------|-----------|-----------|-------------------|--------------------|---------------|---------------|--------------|---------------|---------------|
|                                              | TTGGG                       |       |           |           | +00               | E+00               |               | 8             |              | 017           |               |
| hsa-miR-219a-1-3p_R+<br>1 *                  | AGAGTTGAGTCTGGAC<br>GTCCCGT | up up | inf 2.68  | inf 1.42  | 9.39E-04 1.91E-02 | 9.13E-04 3.08E-02  | 0 5           | 9 13          | 0 9          | 6 29          | middle middle |
| hsa-miR-4659a-3p                             | TTTCTTCTAGACATGG<br>CAACG   | up up | inf 3.61  | inf 1.85  | 3.53E-04 1.03E-02 | 1.93E-04 8.41E-03  | 0 3           | 11 12         | 0 6          | 7 26          | middle middle |
| hsa-miR-550a-3-5p_R+<br>1 <sup>[123]</sup> * | AGTGCCTGAGGGAGTA<br>AGAGA   | up up | inf inf   | inf inf   | 2.11E-09 2.32E-03 | 7.39E-11 1.80E-03  | 0 0           | 30 8          | 0 0          | 20 17         | middle middle |
| hsa-miR-212-3p <sup>[124, 125]</sup>         | TAACAGTCTCCAGTCAC<br>GGCC   | up up | inf 3.59  | inf 1.84  | 7.49E-06 3.63E-09 | 1.82E-06 1.37E-09  | 0 17          | 17 63         | 0 32         | 11 138        | middle middle |
| hsa-miR-130b-3p <sup>[126]</sup>             | CAGTGCAATGATGAAA<br>GGGCAT  | up up | 2.40 3.12 | 1.26 1.64 | 4.46E-85 4.28E-55 | 2.64E-86 3.43E-56  | 459 160       | 1,103 498     | 118 293      | 711 1,098     | middle middle |
| hsa-let-7i-5p <sup>[127]</sup>               | TGAGGTAGTAGTTTGTG<br>CTGTT  | up up | 2.95 2.00 | 1.56 1.00 | 0.00E+00 0.00E+00 | 0.00E+00 0.00E+00  | 13,624 15,844 | 40,214 31,705 | 3,501 29,101 | 25,933 69,935 | high high     |
| hsa-miR-4796-3p_R-1<br>*                     | TAAAGTGGCAGAGTATA<br>GACA   | up up | inf inf   | inf inf   | 3.53E-04 2.95E-04 | 1.93E-04 1.68E-04  | 0 0           | 11 11         | 0 0          | 7 24          | middle middle |
| hsa-miR-6720-3p                              | CGCGCCTGCAGGA<br>GGTAGA     | up up | inf 4.60  | inf 3.87  | 1.12E-06 8.15E-28 | 1.76E-07 2.10E-31  | 0 8           | 20 119        | 0 15         | 13 263        | middle middle |
| hsa-mir-1304-p5                              | CGGTTTGAGGCTACAGT<br>GAGAT  | up up | 4.02 5.71 | 2.01 2.51 | 1.00E-23 6.25E-50 | 1.69E-24 4.76E-53  | 43 52         | 172 295       | 11 95        | 111 651       | middle middle |
| hsa-miR-132-3p <sup>[128]</sup>              | TAACAGTCTACAGCCAT<br>GGTCG  | up up | 2.44 2.16 | 1.28 1.11 | 1.70E-67 2.42E-41 | 2.08E-68 1.75E-41  | 350 268       | 853 580       | 90 492       | 550 1,279     | middle middle |
| hsa-miR-1247-5p <sup>[129-131]</sup>         | ACCCGTCCCCTCGTCC<br>CCGGA   | up up | inf 3.78  | inf 1.92  | 0.00E+00 1.79E-55 | 2.56E-276 1.71E-57 | 0 112         | 816 424       | 0 206        | 526 936       | middle middle |
| hsa-miR-628-3p_L+1 <sup>[132, 133]</sup> *   | TTCTAGTAAGAGTGGCA<br>GTCGA  | up up | 2.19 2.67 | 1.13 1.42 | 8.32E-05 6.97E-26 | 9.21E-05 4.49E-26  | 23 100        | 51 266        | 6 183        | 33 587        | middle middle |
| hsa-miR-190b-5p                              | TGATATGTTGATATTGG           | up up | inf inf   | inf inf   | 5.16E-24 5.42E-   | 4.17E-30 6.21      | 0 0           | 87 21         | 0 0          | 56 46         | middle mi     |

|                               |                            |       |           |           |                       |                       |         |         |        |           |                   |
|-------------------------------|----------------------------|-------|-----------|-----------|-----------------------|-----------------------|---------|---------|--------|-----------|-------------------|
|                               | GTTG                       |       |           |           | 07                    | E-08                  |         |         |        |           | ddle              |
| hsa-miR-1304-3p_1ss13<br>CA * | TCTCACTGTAGCATCGA<br>ACCCC | up up | 2.46 3.05 | 1.30 1.61 | 6.63E-28 7.51E-<br>79 | 3.26E-28 9.31<br>E-81 | 136 242 | 335 737 | 35 444 | 216 1,625 | middle mi<br>ddle |
| hsa-miR-504-5p                | AGACCCTGGTCTGCACT<br>CTATC | up up | inf inf   | inf inf   | 2.89E-06 6.36E-<br>10 | 3.83E-07 1.04<br>E-11 | 0 0     | 19 32   | 0 0    | 12 70     | middle mi<br>ddle |

\*: passenger strand

**Supplementary Table S5: miRNAs set of higher level in the exosomes but lower level inside the cells (SW620 vs. NCM460, Exo|Cell).**

| High in exosome but low in cell (HELC) |                          |         |                                       |                   |                        |                     |               |              |              |             |                  |
|----------------------------------------|--------------------------|---------|---------------------------------------|-------------------|------------------------|---------------------|---------------|--------------|--------------|-------------|------------------|
| miR_name                               | miR_seq                  | up/down | fold_change(SW_620/NCM_460)(Exo Cell) | log2(fold_change) | pvalue(chi_square_2x2) | pvalue(fisher_test) | NCM_460(norm) | SW_620(norm) | NCM_460(raw) | SW_620(raw) | Expression level |
| hsa-miR-29c-5p_L-2R+3 <sup>[1]</sup> * | ACCGATTCTCCTGGTGTTCAGA   | up down | inf 0.47                              | inf -1.10         | 2.53E-03 8.03E-03      | 1.99E-03 9.36E-03   | 0 64          | 8 30         | 0 118        | 5 66        | middle middle    |
| hsa-miR-375-3p <sup>[2]</sup>          | TTTGTTTCGTTTCGGCTCGCGTGA | up down | 4.17 0.11                             | 2.06 -3.19        | 0.00E+00 4.38E-21      | 0.00E+00 1.98E-24   | 3,028 157     | 12,617 17    | 778 289      | 8,136 38    | high high        |
| hsa-miR-449a <sup>[3]</sup>            | TGGCAGTGTATTGTTAGCTGGT   | up down | inf 0.15                              | inf -2.75         | 1.34E-04 6.41E-03      | 8.86E-05 5.80E-03   | 0 15          | 12 2         | 0 28         | 8 5         | middle middle    |
| hsa-miR-590-3p                         | TAATTTTATGTATAAGCTAGT    | up down | 14.82 0.36                            | 3.89 -1.46        | 2.23E-63 1.06E-56      | 4.25E-73 2.56E-59   | 19 1,313      | 288 479      | 5 2,412      | 186 1,056   | middle middle    |
| hsa-mir-3133-p3                        | TTGAGTTTAAAGATTCTTTAT    | up down | inf inf                               | inf inf           | 5.09E-05 1.12E-04      | 1.87E-05 3.38E-05   | 0 18          | 14 0         | 0 33         | 9 0         | middle middle    |
| hsa-miR-9-3p <sup>[4]</sup>            | ATAAAGCTAGATAACCGAAAGT   | up down | 3.25 0.05                             | 1.70 -4.28        | 0.00E+00 3.39E-13      | 5.42E-98 1.27E-15   | 268 76        | 872 4        | 69 140       | 562 9       | middle middle    |
| hsa-miR-128-1-5p                       | CGGGGCCGTAGCACTGCTGAGA   | up down | inf 0.38                              | inf -1.40         | 3.53E-04 1.92E-03      | 1.93E-04 1.49E-03   | 0 54          | 11 20        | 0 99         | 7 45        | middle middle    |
| hsa-miR-140-5p <sup>[5,6]</sup>        | CAGTGGTTTACCTATGGTAG     | up down | 3.93 0.30                             | 1.98 -1.73        | 0.00E+00 6.20E-44      | 5.22E-223 1.16E-46  | 428 746       | 1,684 225    | 110 1,370    | 1,086 496   | middle middle    |
| hsa-miR-556-3p_R-1 <sup>[7]</sup> *    | ATATTACCATTAGCTCATCTT    | up down | inf 0.21                              | inf -2.26         | 7.49E-06 1.49E-03      | 1.82E-06 9.00E-04   | 0 26          | 17 5         | 0 48         | 11 12       | middle middle    |
| hsa-miR-885-5p <sup>[8-10]</sup>       | TCCATTACACTACCCTGCTCT    | up down | inf inf                               | inf inf           | 9.39E-04 1.53E-02      | 9.13E-04 1.85E-02   | 0 7           | 9 0          | 0 13         | 6 0         | low low          |
| hsa-miR-627-3p_L+1 <sup>[11]</sup> *   | CTCTTTTCTTTGAGACTCACT    | up down | inf 0.10                              | inf -3.35         | 2.89E-06 3.04E-06      | 3.83E-07 1.77E-06   | 0 37          | 19 4         | 0 68         | 12 8        | middle middle    |

|                                              |                                |         |            |            |                   |                   |           |           |          |           |               |
|----------------------------------------------|--------------------------------|---------|------------|------------|-------------------|-------------------|-----------|-----------|----------|-----------|---------------|
| hsa-mir-641-p3 <sup>[12, 13]</sup>           | TGACTGTCCTATGCTTT<br>CCT       | up down | inf 0.09   | inf -3.53  | 9.36E-11 1.51E-08 | 6.96E-13 3.54E-09 | 0 52      | 36 5      | 0 96     | 23 10     | middle middle |
| hsa-miR-372-3p <sup>[14, 15]</sup>           | AAAGTGCTGCGACATT<br>GAGCGT     | up down | 2.72 -inf  | 1.45 -inf  | 3.65E-07 2.63E-03 | 2.25E-07 1.46E-03 | 23 11     | 64 0      | 6 20     | 41 0      | middle middle |
| hsa-miR-576-5p <sup>[16, 17]</sup>           | ATTCTAATTTCTCCACGT<br>CTTT     | up down | inf 0.18   | inf -2.49  | 2.57E-08 4.85E-23 | 1.66E-09 1.79E-25 | 0 224     | 26 40     | 0 412    | 17 88     | middle middle |
| hsa-miR-625-3p <sup>[18, 19]</sup>           | GACTATAGAACTTCCCC<br>CTCA      | up down | 16.65 0.36 | 4.06 -1.46 | 0.00E+00 6.61E-23 | 0.00E+00 1.01E-23 | 109 501   | 1,814 182 | 28 921   | 1,170 401 | middle middle |
| hsa-miR-29b-3p <sup>[20, 21]</sup>           | TAGCACCATTGAAATCA<br>GTGTT     | up down | 2.55 0.48  | 1.35 -1.06 | 4.73E-62 2.23E-25 | 4.37E-63 6.23E-26 | 288 1,077 | 735 516   | 74 1,979 | 474 1,139 | middle middle |
| hsa-miR-4521_R+4<br>*                        | GCTAAGGAAGTCCTGTG<br>CTCAGTTTT | up down | inf 0.03   | inf -5.00  | 2.53E-03 0.00E+00 | 1.99E-03 0.00E+00 | 0 4,653   | 8 145     | 0 8,545  | 5 320     | high high     |
| hsa-miR-98-3p_1ss22C<br>T *                  | CTATACAACTTACTACTTT<br>CCT     | up down | inf 0.16   | inf -2.65  | 2.17E-14 3.83E-26 | 1.30E-17 2.43E-29 | 0 239     | 50 38     | 0 439    | 32 84     | middle middle |
| hsa-miR-19a-3p <sup>[22]</sup>               | TGTGCAAATCTATGCAAA<br>ACTGA    | up down | 3.35 0.35  | 1.75 -1.53 | 5.33E-88 8.61E-56 | 5.23E-91 1.10E-58 | 233 1,186 | 783 412   | 60 2,177 | 505 908   | middle middle |
| hsa-miR-200b-5p <sup>[23-27]</sup>           | CATCTTACTGGGCAGCAT<br>TGGA     | up down | 3.02 -inf  | 1.59 -inf  | 3.64E-81 1.18E-47 | 3.44E-83 4.28E-67 | 265 253   | 799 0     | 68 465   | 515 0     | middle middle |
| hsa-miR-30d-3p <sup>[28]</sup>               | CTTTCAGTCAGATGTTTG<br>CTGC     | up down | 3.49 0.10  | 1.80 -3.33 | 4.99E-14 6.66E-32 | 1.96E-14 4.41E-37 | 31 236    | 109 24    | 8 434    | 70 52     | middle middle |
| hsa-miR-548a-5p_R+3 <sup>[29, 30]</sup><br>* | AAAAGTAATTGCGGTCTT<br>TGGT     | up down | inf 0.15   | inf -2.70  | 2.53E-03 1.65E-03 | 1.99E-03 8.36E-04 | 0 21      | 8 3       | 0 38     | 5 7       | middle middle |
| hsa-miR-548d-3p <sup>[31-33]</sup>           | CAAAAACCACAGTTTCT<br>TTTGC     | up down | inf 0.22   | inf -2.19  | 3.27E-02 1.67E-02 | 4.46E-02 1.01E-02 | 0 16      | 4 3       | 0 29     | 3 8       | middle middle |
| hsa-miR-10399-5p_R+<br>1 *                   | AATTACAGATTGTCTCAG<br>AGAA     | up down | inf 0.07   | inf -3.77  | 2.57E-08 1.07E-06 | 1.66E-09 2.30E-07 | 0 37      | 26 3      | 0 68     | 17 6      | middle middle |



|                                            |                             |         |           |            |                   |                   |           |           |           |           |               |
|--------------------------------------------|-----------------------------|---------|-----------|------------|-------------------|-------------------|-----------|-----------|-----------|-----------|---------------|
| hsa-miR-34a-5p <sup>[34-36]</sup>          | TGGCAGTGTCTTAGCTGG<br>TTGT  | up down | 2.28 0.28 | 1.19 -1.84 | 0.00E+00 1.94E-43 | 6.26E-15 2.27E-46 | 918 666   | 2,097 186 | 236 1,224 | 1,352 410 | middle middle |
| hsa-miR-135b-3p                            | ATGTAGGGCTAAAAGCCA<br>TGGG  | up down | inf 0.07  | inf -3.92  | 1.31E-19 1.95E-06 | 2.29E-24 2.24E-07 | 0 34      | 70 2      | 0 63      | 45 5      | middle middle |
| hsa-miR-33a-5p_R-1 <sup>[37-44]</sup> *    | GTGCATTGTAGTTGCATT<br>GC    | up down | 2.09 0.10 | 1.06 -3.29 | 1.41E-11 5.55E-10 | 1.40E-11 5.22E-11 | 78 66     | 163 7     | 20 122    | 105 15    | middle middle |
| hsa-miR-181a-3p                            | ACCATCGACCGTTGATTG<br>TACC  | up down | 2.68 0.01 | 1.42 -6.58 | 5.01E-19 2.06E-62 | 4.54E-19 2.97E-84 | 74 347    | 198 4     | 19 637    | 128 8     | middle middle |
| hsa-miR-625-5p <sup>[45]</sup>             | AGGGGAAAGTTCTATA<br>GTCC    | up down | 9.39 0.35 | 3.23 -1.52 | 0.00E+00 3.72E-06 | 7.85E-11 2.31E-06 | 54 103    | 512 36    | 14 189    | 330 79    | middle middle |
| hsa-miR-15b-3p_R-1 *                       | CGAATCATTATTGCTGC<br>TCT    | up down | 3.73 0.37 | 1.90 -1.44 | 0.00E+00 4.14E-50 | 8.90E-97 2.11E-52 | 202 1,176 | 755 433   | 52 2,159  | 487 954   | middle middle |
| hsa-miR-2467-5p_R+1 *                      | TGAGGCTCTGTAGCCTT<br>GGCTCT | up down | inf 0.18  | inf -2.46  | 2.53E-03 6.30E-03 | 1.99E-03 6.20E-03 | 0 17      | 8 3       | 0 32      | 5 7       | middle middle |
| hsa-miR-548aa_L-1R-2 <sup>[46, 47]</sup> * | AAAACCACAATTACTTTT<br>GCAC  | up down | inf 0.38  | inf -1.40  | 2.68E-05 5.63E-03 | 8.60E-06 5.60E-03 | 0 43      | 15 16     | 0 79      | 10 36     | middle middle |
| hsa-miR-31-3p_R+1 <sup>[48]</sup> *        | TGCTATGCCAACATATTG<br>CCATC | up down | 2.85 0.15 | 1.51 -2.70 | 3.71E-16 1.05E-81 | 1.39E-16 4.36E-93 | 54 766    | 155 117   | 14 1,406  | 100 259   | middle middle |
| hsa-miR-374a-3p                            | CTATCAGATTGTATTGTA<br>ATT   | up down | 6.69 0.32 | 2.74 -1.66 | 6.81E-24 3.41E-67 | 9.38E-26 3.08E-71 | 19 1,237  | 130 391   | 5 2,272   | 84 862    | middle middle |
| hsa-miR-23b-5p_L-1 <sup>[49, 50]</sup> *   | GGGTTCTGGCATGCTGA<br>TTT    | up down | inf 0.34  | inf -1.55  | 1.37E-35 1.21E-03 | 2.65E-45 1.22E-03 | 0 49      | 132 17    | 0 90      | 85 37     | middle middle |
| hsa-miR-548ae-5p_R+2 *                     | AAAAGTAATTGTGGTTTT<br>TGCC  | up down | 2.68 0.32 | 1.42 -1.64 | 2.66E-04 3.81E-05 | 2.53E-04 4.18E-05 | 12 71     | 33 23     | 3 131     | 22 51     | middle middle |
| hsa-miR-26b-3p_R+1 <sup>[51, 52]</sup> *   | CCTGTTCTCCACTTGTG<br>GCTC   | up down | inf 0.47  | inf -1.08  | 1.69E-07 1.61E-02 | 1.71E-08 1.43E-02 | 0 56      | 23 26     | 0 102     | 15 58     | middle middle |

|                                         |                              |         |             |            |                   |                    |               |                |                |               |               |
|-----------------------------------------|------------------------------|---------|-------------|------------|-------------------|--------------------|---------------|----------------|----------------|---------------|---------------|
| hsa-miR-9-5p <sup>[53-56]</sup>         | TCTTTGGTTATCTAGCTGT<br>ATGA  | up down | 4.06 0.01   | 2.02 -6.72 | 0.00E+00 1.39E-32 | 6.64E-119 2.68E-43 | 214 176       | 869 2          | 55 323         | 561 4         | middle middle |
| hsa-miR-454-3p_R+1 <sup>[57-59]</sup> * | TAGTGCAATATTGCTTATA<br>GGGTT | up down | inf 0.39    | inf -1.36  | 1.12E-87 8.26E-47 | 7.34E-114 8.77E-49 | 0 1,220       | 335 474        | 0 2,240        | 216 1,046     | middle middle |
| hsa-miR-499a-5p <sup>[60, 61]</sup>     | TTAAGACTGCAGTGATG<br>TTT     | up down | 111.34 0.24 | 6.80 -2.07 | 0.00E+00 9.89E-06 | 0.00E+00 1.14E-05  | 175 57        | 19,499 14      | 45 105         | 12,574 30     | high high     |
| hsa-miR-146a-5p <sup>[62-66]</sup>      | TGAGAACTGAATCCATG<br>GGTT    | up down | 12.56 0.04  | 3.65 -4.51 | 0.00E+00 0.00E+00 | 0.00E+00 3.59E-193 | 1,442 962     | 18,110 42      | 371 1,766      | 11,679 93     | high high     |
| hsa-mir-33a-p3                          | TGTTCTGGTGGTACCCAT<br>G      | up down | inf 0.25    | inf -1.99  | 2.53E-03 1.53E-06 | 1.99E-03 6.63E-07  | 0 72          | 8 18           | 0 132          | 5 40          | middle middle |
| hsa-miR-579-3p <sup>[67]</sup>          | TTCATTTGGTATAAACCG<br>CGATT  | up down | inf 0.15    | inf -2.70  | 9.36E-11 1.05E-21 | 6.96E-13 1.58E-24  | 0 192         | 36 29          | 0 352          | 23 65         | middle middle |
| hsa-miR-548n                            | CAAAAGTAATTGTGGATT<br>TTGT   | up down | inf 0.25    | inf -2.00  | 1.12E-06 5.15E-05 | 1.76E-07 4.18E-05  | 0 51          | 20 13          | 0 93           | 13 28         | middle middle |
| hsa-miR-10399-3p_L+<br>1_1ss22CT *      | TCTCTCGACAAGCTGTA<br>GGTT    | up down | inf 0.08    | inf -3.68  | 3.53E-04 2.67E-06 | 1.93E-04 6.93E-07  | 0 35          | 11 3           | 0 64           | 7 6           | middle middle |
| hsa-miR-29a-3p_R-1 <sup>[68-72]</sup> * | TAGCACCATCTGAAATCG<br>GTT    | up down | 2.09 0.44   | 1.06 -1.17 | 0.00E+00 0.00E+00 | 0.00E+00 0.00E+00  | 54,704 70,707 | 114,101 31,379 | 14,057 129,864 | 73,580 69,214 | high high     |
| hsa-miR-374b-3p                         | CTTAGCAGGTTGTATTAT<br>CATT   | up down | inf 0.43    | inf -1.21  | 5.26E-30 2.37E-06 | 7.12E-38 2.34E-06  | 0 166         | 110 72         | 0 305          | 71 158        | middle middle |
| hsa-miR-10401-3p_L+<br>1R-1 *           | GACCTCGCCGTCGCC<br>CGCC      | up down | 10.46 0.48  | 3.39 -1.05 | 3.84E-66 1.11E-02 | 2.41E-74 1.12E-02  | 31 66         | 326 32         | 8 122          | 210 71        | middle middle |
| hsa-miR-135b-5p <sup>[73, 74]</sup>     | TATGGCTTTTCATTCTAT<br>GTGA   | up down | 12.08 0.02  | 3.59 -5.37 | 0.00E+00 0.00E+00 | 0.00E+00 2.39E-217 | 245 977       | 2,962 24       | 63 1,795       | 1,910 52      | middle middle |
| hsa-miR-577_L+1 <sup>[75-80]</sup> *    | GTAGATAAAATATTGGTA<br>CCTG   | up down | inf -inf    | inf -inf   | 0.00E+00 2.68E-27 | 2.86E-145 1.07E-37 | 0 141         | 428 0          | 0 259          | 276 0         | middle middle |

|                |                           |         |          |          |                   |                   |      |       |      |       |                   |
|----------------|---------------------------|---------|----------|----------|-------------------|-------------------|------|-------|------|-------|-------------------|
| hsa-miR-192-3p | CTGCCAATCCATAGGTC<br>ACAG | up down | inf -inf | inf -inf | 6.05E-46 2.06E-03 | 8.21E-59 1.46E-03 | 0 11 | 172 0 | 0 21 | 111 0 | middle m<br>iddle |
|----------------|---------------------------|---------|----------|----------|-------------------|-------------------|------|-------|------|-------|-------------------|

\*: passenger strand

## Supplementary References

- [1] H J, G Z, JH W, et al. Diverse roles of miR-29 in cancer (review) [J]. *Oncology reports*, 2014, 31(4): 1509-16.
- [2] ML S, JS H, DF P, et al. MicroRNA profiles in colorectal carcinomas, adenomas and normal colonic mucosa: variations in miRNA expression and disease progression [J]. *Carcinogenesis*, 2016, 37(3): 245-61.
- [3] X S, S L, P C, et al. miR-449a inhibits colorectal cancer progression by targeting SATB2 [J]. *Oncotarget*, 2017, 8(60): 100975-88.
- [4] L C, JK R, J B, et al. MiR-9, -31, and -182 deregulation promote proliferation and tumor cell survival in colon cancer [J]. *Neoplasia (New York, NY)*, 2012, 14(9): 868-79.
- [5] W Z, C Z, L P, et al. MicroRNA-140-5p inhibits the progression of colorectal cancer by targeting VEGFA [J]. *Cellular physiology and biochemistry : international journal of experimental cellular physiology, biochemistry, and pharmacology*, 2015, 37(3): 1123-33.
- [6] L Y, Y L, X H, et al. microRNA -140-5p inhibits colorectal cancer invasion and metastasis by targeting ADAMT5 and IGFBP5 [J]. *Stem cell research & therapy*, 2016, 7(1): 180.
- [7] FENG C, SUN P, HU J, et al. miRNA-556-3p promotes human bladder cancer proliferation, migration and invasion by negatively regulating DAB2IP expression [J]. *International Journal of Oncology*, 2017, 50(6): 2101-12.
- [8] Z B, W T, G H. miR-885-5p suppresses osteosarcoma proliferation, migration and invasion through regulation of  $\beta$ -catenin.%A Liu Y [J]. *Oncology letters*, 2019, 17(2): 1996-2004.
- [9] Z W, XW W, SL W, et al. MicroRNA-885-5p promotes osteosarcoma proliferation and migration by downregulation of cell division cycle protein 73 homolog expression.%A Yu FQ [J]. *Oncology letters*, 2019, 17(2): 1565-72.
- [10] B Q, F L, Y C, et al. miR-885-5p upregulation promotes colorectal cancer cell proliferation and migration by targeting suppressor of cytokine signaling.%A Su M [J]. *Oncology letters*, 2018, 16(1): 65-72.
- [11] Q Z, YM R, C M, et al. MicroRNA-627 mediates the epigenetic mechanisms of vitamin D to suppress proliferation of human colorectal cancer cells and growth of xenograft tumors in mice.%A Padi SK [J]. *Gastroenterology*, 2013, 145(2): 437-46.
- [12] H Z, L W, P C. miRNA-641 inhibits the proliferation, migration, and invasion and induces apoptosis of cervical cancer cells by directly targeting .%A Yao R [J]. *OncoTargets and therapy*, 2018, 11(undefined): 8965-76.
- [13] N S, J L, N X. miR-641 Functions as a Tumor Suppressor by Targeting MDM2 in Human Lung Cancer.%A Kong Q [J]. *Oncology research*, 2018, 26(5): 735-41.
- [14] PF X, TT G. MiR-372-3p inhibits the growth and metastasis of osteosarcoma cells by targeting FXVD6.%A Xu SY [J]. *European review for medical and pharmacological sciences*, 2018, 22(1): 62-9.
- [15] S L, X Z, Y W, et al. MiR-372-3p promotes cell growth and metastasis by targeting FGF9 in lung squamous cell carcinoma.%A Wang Q [J]. *Cancer medicine*, 2017, 6(6):

1323-30.

- [16] LH Z, G L, M H, et al. MicroRNA-548-3p and MicroRNA-576-5p enhance the migration and invasion of esophageal squamous cell carcinoma cells via NRIP1 down-regulation.%A Ni XF [J]. *Neoplasma*, 2018, 65(6): 881-7.
- [17] ZH C, WC C. Novel circulating microRNAs expression profile in colon cancer: a pilot study.%A Wang YN [J]. *European journal of medical research*, 2017, 22(1): 51.
- [18] R M, Q W, P Z, et al. MiR-625-3p promotes cell migration and invasion via inhibition of SCAI in colorectal carcinoma cells.%A Zheng H [J]. *Oncotarget*, 2015, 6(29): 27805-15.
- [19] D K, W X. MicroRNA-625-3p promotes the proliferation, migration and invasion of thyroid cancer cells by up-regulating astrocyte elevated gene 1.%A Fang L [J]. *Biomedicine & pharmacotherapy = Biomedecine & pharmacotherapie*, 2018, 102(undefiend): 203-11.
- [20] C L, T Z, D L, et al. LncRNA H19/miR-29b-3p/PGRN Axis Promoted Epithelial-Mesenchymal Transition of Colorectal Cancer Cells by Acting on Wnt Signaling.%A Ding D [J]. *Molecules and cells*, 2018, 41(5): 423-35.
- [21] O Y, O O, OI C, et al. Differential expressions of cancer-associated genes and their regulatory miRNAs in colorectal carcinoma.%A Kara M [J]. *Gene*, 2015, 567(1): 81-6.
- [22] Z Z, C C, Y L, et al. MicroRNA-19a-3p inhibits breast cancer progression and metastasis by inducing macrophage polarization through downregulated expression of Fra-1 proto-oncogene.%A Yang J [J]. *Oncogene*, 2014, 33(23): 3014-23.
- [23] BR L, JH K, ES C, et al. Effect of young exosomes injected in aged mice [J]. *International journal of nanomedicine*, 2018, 13(undefiend): 5335-45.
- [24] K H, M R, J G, et al. Expression profiles of miR-29c, miR-200b and miR-375 in tumour and tumour-adjacent tissues of head and neck cancers [J]. *Tumour biology : the journal of the International Society for Oncodevelopmental Biology and Medicine*, 2016, 37(9): 12627-33.
- [25] K X, C W, N Q, et al. Genetic variants in regulatory regions of microRNAs are associated with lung cancer risk [J]. *Oncotarget*, 2016, 7(30): 47966-74.
- [26] LV R, EC M, HC S, et al. Dual regulation by microRNA-200b-3p and microRNA-200b-5p in the inhibition of epithelial-to-mesenchymal transition in triple-negative breast cancer [J]. *Oncotarget*, 2015, 6(18): 16638-52.
- [27] R C, F B, M D N, et al. microRNAs derived from circulating exosomes as noninvasive biomarkers for screening and diagnosing lung cancer [J]. *Journal of thoracic oncology : official publication of the International Association for the Study of Lung Cancer*, 2013, 8(9): 1156-62.
- [28] K W, M C, W W. Analysis of microRNA (miRNA) expression profiles reveals 11 key biomarkers associated with non-small cell lung cancer [J]. *World journal of surgical oncology*, 2017, 15(1): 175.
- [29] G Z, T W, QK H, et al. MicroRNA-548a-5p promotes proliferation and inhibits apoptosis in hepatocellular carcinoma cells by targeting Tg737 [J]. *World journal of gastroenterology*, 2016, 22(23): 5364-73.
- [30] H P, J T, F R, et al. Chromosomal, epigenetic and microRNA-mediated inactivation of LRP1B, a modulator of the extracellular environment of thyroid cancer cells [J].

Oncogene, 2011, 30(11): 1302-17.

[31] J T, L X, G X. LncRNA MEG3 suppresses migration and promotes apoptosis by sponging miR-548d-3p to modulate JAK-STAT pathway in oral squamous cell carcinoma [J]. IUBMB life, 2019, undefined(undefined): undefined.

[32] Q S, J S, Q W, et al. miR-548d-3p/TP53BP2 axis regulates the proliferation and apoptosis of breast cancer cells [J]. Cancer medicine, 2016, 5(2): 315-24.

[33] H C, JG S, XW C, et al. Preliminary validation of ERBB2 expression regulated by miR-548d-3p and miR-559 [J]. Biochemical and biophysical research communications, 2009, 385(4): 596-600.

[34] Z W, J L, X Z, et al. A three plasma microRNA signature for papillary thyroid carcinoma diagnosis in Chinese patients [J]. Gene, 2019, 693(undefined): 37-45.

[35] YY L, YW T, S G, et al. Cancer-associated fibroblasts contribute to oral cancer cells proliferation and metastasis via exosome-mediated paracrine miR-34a-5p [J]. EBioMedicine, 2018, 36(undefined): 209-20.

[36] M R, C B-S, NP H, et al. Identification of non-invasive miRNAs biomarkers for prostate cancer by deep sequencing analysis of urinary exosomes [J]. Molecular cancer, 2017, 16(1): 156.

[37] J P, C Z, X Z, et al. A two-miRNA signature (miR-33a-5p and miR-128-3p) in whole blood as potential biomarker for early diagnosis of lung cancer [J]. Scientific reports, 2018, 8(1): 16699.

[38] P L, B C, Y G, et al. PNMA1, regulated by miR-33a-5p, promotes proliferation and EMT in hepatocellular carcinoma by activating the Wnt/ $\beta$ -catenin pathway [J]. Biomedicine & pharmacotherapy = Biomedecine & pharmacotherapie, 2018, 108(undefined): 492-9.

[39] JX Y, Y S, L G, et al. Long non-coding RNA DANCR facilitates glioma malignancy by sponging miR-33a-5p [J]. Neoplasma, 2018, 65(5): 790-8.

[40] Z Z, L M, Z G, et al. Long non-coding RNA CASC15 promotes tongue squamous carcinoma progression through targeting miR-33a-5p [J]. Environmental science and pollution research international, 2018, 25(22): 22205-12.

[41] K C, J L, J C, et al. microRNA-33a-5p increases radiosensitivity by inhibiting glycolysis in melanoma [J]. Oncotarget, 2017, 8(48): 83660-72.

[42] N J, X W, X X, et al. lncRNA DANCR promotes tumor progression and cancer stemness features in osteosarcoma by upregulating AXL via miR-33a-5p inhibition [J]. Cancer letters, 2017, 405(undefined): 46-55.

[43] W M, Q S, X C, et al. miR-33a-5p modulates TNF- $\alpha$ -inhibited osteogenic differentiation by targeting SATB2 expression in hBMSCs [J]. FEBS letters, 2016, 590(3): 396-407.

[44] J Z, D W, J X, et al. MicroRNA-33a-5p suppresses growth of osteosarcoma cells and is downregulated in human osteosarcoma [J]. Oncology letters, 2015, 10(4): 2135-41.

[45] H Z, C F, M Z, et al. miR-625-5p/PKM2 negatively regulates melanoma glycolysis state [J]. Journal of cellular biochemistry, 2019, 120(3): 2964-72.

- [46] F C, E I, S L, et al. New tumor suppressor microRNAs target glypican-3 in human liver cancer [J]. *Oncotarget*, 2017, 8(25): 41211-26.
- [47] A B, E O-W, K N, et al. Altered Expression of miRNAs Is Related to Larynx Cancer TNM Stage and Patients' Smoking Status [J]. *DNA and cell biology*, 2017, 36(7): 581-8.
- [48] G M, S I, R T, et al. Hsa-miR-31-3p expression is linked to progression-free survival in patients with KRAS wild-type metastatic colorectal cancer treated with anti-EGFR therapy [J]. *Clinical cancer research : an official journal of the American Association for Cancer Research*, 2014, 20(12): 3338-47.
- [49] J B-R, JR L, HB M, et al. Micro-RNA Profiling of Exosomes from Marrow-Derived Mesenchymal Stromal Cells in Patients with Acute Myeloid Leukemia: Implications in Leukemogenesis [J]. *Stem cell reviews*, 2017, 13(6): 817-25.
- [50] U W-E, SH C, AH H, et al. Exosomal onco-miRs from serum of patients with adenocarcinoma of the esophagus: comparison of miRNA profiles of exosomes and matching tumor [J]. *Tumour biology : the journal of the International Society for Oncodevelopmental Biology and Medicine*, 2015, 36(6): 4643-53.
- [51] Y L, L X, Y Z, et al. MiR-26b-3p regulates osteoblast differentiation via targeting estrogen receptor  $\alpha$  [J]. *Genomics*. 2019, 111(5):1089-96.
- [52] Q W, C X, Y Z, et al. miR-26b-3p Regulates Human Umbilical Cord-Derived Mesenchymal Stem Cell Proliferation by Targeting Estrogen Receptor [J]. *Stem cells and development*, 2016, 25(5): 415-26.
- [53] J W, B W, H R, et al. miR-9-5p inhibits pancreatic cancer cell proliferation, invasion and glutamine metabolism by targeting GOT1 [J]. *Biochemical and biophysical research communications*, 2019, 509(1): 241-8.
- [54] G L, F W, H Y, et al. MiR-9-5p promotes cell growth and metastasis in non-small cell lung cancer through the repression of TGFBR2 [J]. *Biomedicine & pharmacotherapy = Biomedecine & pharmacotherapie*, 2017, 96(undefined): 1170-8.
- [55] J R, JL V-H, A P, et al. MicroRNA Profile in Patients with Alzheimer's Disease: Analysis of miR-9-5p and miR-598 in Raw and Exosome Enriched Cerebrospinal Fluid Samples [J]. *Journal of Alzheimer's disease : JAD*, 2017, 57(2): 483-91.
- [56] F G, X H, Q S. MicroRNA-9-5p functions as a tumor suppressor in papillary thyroid cancer via targeting BRAF [J]. *Oncology letters*, 2018, 16(5): 6815-21.
- [57] D J, H L, H X, et al. Long Chain Non-Coding RNA (lncRNA) HOTAIR Knockdown Increases miR-454-3p to Suppress Gastric Cancer Growth by Targeting STAT3/Cyclin D1 [J]. *Medical science monitor : international medical journal of experimental and clinical research*, 2019, 25(undefined): 1537-48.
- [58] C J, T L, L S. Downregulation of Calbindin 1 by miR-454-3p Suppresses Cell Proliferation in Nonsmall Cell Lung Cancer In Vitro [J]. *Cancer biotherapy & radiopharmaceuticals*, 2019, 34(2): 119-27.
- [59] N S, L X, R W, et al. miR-454-3p Is an Exosomal Biomarker and Functions as a Tumor Suppressor in Glioma [J]. *Molecular cancer therapeutics*, 2019, 18(2): 459-69.
- [60] JC S, B Z, RX S, et al. MiR-499a-5p suppresses apoptosis of human nucleus pulposus cells and degradation of their extracellular matrix by targeting SOX4 [J]. *Biomedicine & pharmacotherapy = Biomedecine & pharmacotherapie*, 2019, 113(undefined): 108652.
- [61] J L, L H, P S, et al. MicroRNA-499a-5p inhibits osteosarcoma cell proliferation and differentiation by targeting protein phosphatase 1D through protein kinase

B/glycogen synthase kinase 3 $\beta$  signaling [J]. *Oncology letters*, 2018, 15(4): 4113-20.

[62] DL Y, BB S, J L, et al. MiR-146a-5p level in serum exosomes predicts therapeutic effect of cisplatin in non-small cell lung cancer [J]. *European review for medical and pharmacological sciences*, 2017, 21(11): 2650-8.

[63] Y T, W A, A S, et al. Small RNAs detected in exosomes derived from the MH7A synovial fibroblast cell line with TNF- $\alpha$  stimulation [J]. *PloS one*, 2018, 13(8): e0201851.

[64] JP L, LF D, FF C, et al. miR-146a-5p targets interleukin-1 receptor-associated kinase 1 to inhibit the growth, migration, and invasion of breast cancer cells [J]. *Oncology letters*, 2019, 17(2): 1573-80.

[65] W G, J H, Z J, et al. Expression of miR-146a-5p in breast cancer and its role in proliferation of breast cancer cells [J]. *Oncology letters*, 2018, 15(6): 9884-8.

[66] YL L, J W, CY Z, et al. MiR-146a-5p inhibits cell proliferation and cell cycle progression in NSCLC cell lines by targeting CCND1 and CCND2 [J]. *Oncotarget*, 2016, 7(37): 59287-98.

[67] L F, R M, M A, et al. miR-579-3p controls melanoma progression and resistance to target therapy [J]. *Proceedings of the National Academy of Sciences of the United States of America*, 2016, 113(34): E5005-13.

[68] J C, N G, B Q, et al. OSCC-derived exosomes promote M2-type macrophage polarization mediated by exosome-enclosed miR-29a-3p [J]. *American journal of physiology Cell physiology*, 2019, undefined(undefined): undefined.

[69] Y M, Y S. miR-29a-3p inhibits growth, proliferation, and invasion of papillary thyroid carcinoma by suppressing NF- $\kappa$ B signaling via direct targeting of OTUB2 [J]. *Cancer management and research*, 2019, 11(undefined): 13-23.

[70] X W, S L, L C, et al. miR-29a-3p suppresses cell proliferation and migration by downregulating IGF1R in hepatocellular carcinoma [J]. *Oncotarget*, 2017, 8(49): 86592-603.

[71] J S, E L, L L, et al. MiR-29a-3p suppresses cell proliferation in laryngocarcinoma by targeting prominin 1 [J]. *FEBS open bio*, 2017, 7(5): 645-51.

[72] Z Z, L W, W S, et al. Reduced miR-29a-3p expression is linked to the cell proliferation and cell migration in gastric cancer [J]. *World journal of surgical oncology*, 2015, 13(undefined): 101.

[73] Z Z, X C, N Y, et al. miR-135b-5p Promotes migration, invasion and EMT of pancreatic cancer cells by targeting NR3C2 [J]. *Biomedicine & pharmacotherapy = Biomedecine & pharmacotherapie*, 2017, 96(undefined): 1341-8.

[74] M L, Y H, W S, et al. miR-135b-5p promotes gastric cancer progression by targeting CMTM3 [J]. *International journal of oncology*, 2018, 52(2): 589-98.

[75] C Y, Q M, X P, et al. MiR-577 suppresses epithelial-mesenchymal transition and metastasis of breast cancer by targeting Rab25 [J]. *Thoracic cancer*, 2018, 9(4): 472-9.

[76] B W, L S, J L, et al. miR-577 suppresses cell proliferation and epithelial-mesenchymal transition by regulating the WNT2B mediated Wnt/ $\beta$ -catenin pathway in non-small cell lung cancer [J]. *Molecular medicine reports*, 2018, 18(3): 2753-61.



- [77] KC X, DD H, L Z, et al. MiR-577 inhibits papillary thyroid carcinoma cell proliferation, migration and invasion by targeting SphK2 [J]. *European review for medical and pharmacological sciences*, 2017, 21(17): 3794-800.
- [78] W Z, C S, C L, et al. miR-577 inhibits glioblastoma tumor growth via the Wnt signaling pathway [J]. *Molecular carcinogenesis*, 2016, 55(5): 575-85.
- [79] LY W, B L, HH J, et al. Inhibition effect of miR-577 on hepatocellular carcinoma cell growth via targeting  $\beta$ -catenin [J]. *Asian Pacific journal of tropical medicine*, 2015, 8(11): 923-9.
- [80] H J, H J, L Z, et al. microRNA-577 suppresses tumor growth and enhances chemosensitivity in colorectal cancer [J]. *Journal of biochemical and molecular toxicology*, 2017, 31(6): undefined.
- [81] D Y, Y M, D W, et al. Prognostic Role of Circulating Exosomal miR-425-3p for the Response of NSCLC to Platinum-Based Chemotherapy [J]. *Cancer epidemiology, biomarkers & prevention : a publication of the American Association for Cancer Research, cosponsored by the American Society of Preventive Oncology*, 2019, 28(1): 163-73.
- [82] T F, H L, G L, et al. Tumor-derived exosomal miR-1247-3p induces cancer-associated fibroblast activation to foster lung metastasis of liver cancer [J]. *Nature communications*, 2018, 9(1): 191.
- [83] N M, MT V, R G-C, et al. Tumor microRNA expression profiling identifies circulating microRNAs for early breast cancer detection [J]. *Clinical chemistry*, 2015, 61(8): 1098-106.
- [84] M L, Z Q, X M, et al. MiR-628-5p decreases the tumorigenicity of epithelial ovarian cancer cells by targeting at FGFR2 [J]. *Biochemical and biophysical research communications*, 2018, 495(2): 2085-91.
- [85] A S, H G, A D, et al. Circulatory miR-628-5p is downregulated in prostate cancer patients [J]. *Tumour biology : the journal of the International Society for Oncodevelopmental Biology and Medicine*, 2014, 35(5): 4867-73.
- [86] X Q, S Y, X X, et al. Comparative analysis of microRNA expression profiles between A549, A549/DDP and their respective exosomes [J]. *Oncotarget*, 2017, 8(26): 42125-35.
- [87] B J, L X, F C. The role of miR-766-5p in cell migration and invasion in colorectal cancer [J]. *Experimental and therapeutic medicine*, 2018, 15(3): 2569-74.
- [88] K W, R Y, T O. MicroRNA-664a-5p promotes neuronal differentiation of SH-SY5Y cells [J]. *Genes to cells : devoted to molecular & cellular mechanisms*, 2018, 23(3): 225-33.
- [89] TH Y, C Q, J S, et al. MiR-877-5p suppresses cell growth, migration and invasion by targeting cyclin dependent kinase 14 and predicts prognosis in hepatocellular carcinoma [J]. *European review for medical and pharmacological sciences*, 2018, 22(10): 3038-46.
- [90] X J, Y C, H C, et al. Evaluation of Tumor-Derived Exosomal miRNA as Potential Diagnostic Biomarkers for Early-Stage Non-Small Cell Lung Cancer Using Next-Generation

Sequencing [J]. *Clinical cancer research : an official journal of the American Association for Cancer Research*, 2017, 23(17): 5311-9.

[91] L T, Z Z, L X, et al. MiR-361-5p inhibits the mobility of gastric cancer cells through suppressing epithelial-mesenchymal transition via the Wnt/ $\beta$ -catenin pathway [J]. *Gene*, 2018, 675(undefined): 102-9.

[92] J L, J Y, L Y, et al. miR-361-5p inhibits glioma migration and invasion by targeting SND1 [J]. *OncoTargets and therapy*, 2018, 11(undefined): 5239-52.

[93] X Z, R S, W G, et al. Inhibition of miR-361-5p suppressed pulmonary artery smooth muscle cell survival and migration by targeting ABCA1 and inhibiting the JAK2/STAT3 pathway [J]. *Experimental cell research*, 2018, 363(2): 255-61.

[94] J H, J Y, Y D, et al. Overexpression of miR-361-5p in triple-negative breast cancer (TNBC) inhibits migration and invasion by targeting RQCD1 and inhibiting the EGFR/PI3K/Akt pathway [J]. *Bosnian journal of basic medical sciences*, 2019, 19(1): 52-9.

[95] F M, L Z, L M, et al. MiR-361-5p inhibits glycolytic metabolism, proliferation and invasion of breast cancer by targeting FGFR1 and MMP-1 [J]. *Journal of experimental & clinical cancer research : CR*, 2017, 36(1): 158.

[96] L T, Z Z, L X, et al. MiR-361-5p suppresses chemoresistance of gastric cancer cells by targeting FOXM1 via the PI3K/Akt/mTOR pathway [J]. *Oncotarget*, 2018, 9(4): 4886-96.

[97] XW H, X S, Y Y, et al. miR-361-5p suppresses lung cancer cell lines progression by targeting FOXM1 [J]. *Neoplasma*, 2017, 64(4): 526-34.

[98] W C, Y L, K X, et al. miR-361-5p inhibits hepatocellular carcinoma cell proliferation and invasion by targeting VEGFA [J]. *Biochemical and biophysical research communications*, 2016, 479(4): 901-6.

[99] ZG C, YN H, L Y, et al. Positive expression of miR-361-5p indicates better prognosis for breast cancer patients [J]. *Journal of thoracic disease*, 2016, 8(7): 1772-9.

[100] ZL Z, FM T, CL S. Downregulation of miR-361-5p associates with aggressive clinicopathological features and unfavorable prognosis in non-small cell lung cancer [J]. *European review for medical and pharmacological sciences*, 2016, 20(24): 5132-6.

[101] F M, H S, B G, et al. MiR-361-5p inhibits colorectal and gastric cancer growth and metastasis by targeting staphylococcal nuclease domain containing-1 [J]. *Oncotarget*, 2015, 6(19): 17404-16.

[102] D L, T T, B X, et al. MiR-361-5p acts as a tumor suppressor in prostate cancer by targeting signal transducer and activator of transcription-6(STAT6) [J]. *Biochemical and biophysical research communications*, 2014, 445(1): 151-6.

[103] Y F, X L, Q C, et al. Downregulated miR-98-5p promotes PDAC proliferation and metastasis by reversely regulating MAP4K4 [J]. *Journal of experimental & clinical cancer research : CR*, 2018, 37(1): 130.

[104] F W, Q M, X W, et al. NEAT1/hsa-mir-98-5p/MAPK6 axis is involved in non-small-cell lung cancer development [J]. *Journal of cellular biochemistry*, 2019, 120(3): 2836-46.

- [105] T J, M L, Q L, et al. MicroRNA-98-5p Inhibits Cell Proliferation and Induces Cell Apoptosis in Hepatocellular Carcinoma via Targeting IGF2BP1 [J]. *Oncology research*, 2017, 25(7): 1117-27.
- [106] Y F L, J R Y, Z Y, et al. Promoter hypomethylation mediated upregulation of MicroRNA-10b-3p targets FOXO3 to promote the progression of esophageal squamous cell carcinoma (ESCC) [J]. *Journal of experimental & clinical cancer research : CR*, 2018, 37(1): 301.
- [107] L G, D J, N L, et al. Up-regulation of miR-10b-3p promotes the progression of hepatocellular carcinoma cells via targeting CMTM5 [J]. *Journal of cellular and molecular medicine*, 2018, 22(7): 3434-41.
- [108] M Z, Z H, D Z, et al. A panel of microRNA signature in serum for colorectal cancer diagnosis [J]. *Oncotarget*, 2017, 8(10): 17081-91.
- [109] Z Z, M W, J G, et al. Clinical value of miR-425-5p detection and its association with cell proliferation and apoptosis of gastric cancer [J]. *Pathology, research and practice*, 2017, 213(8): 929-37.
- [110] J Q, Y L, X P, et al. Oncogenic miR-425-5p is associated with cellular migration, proliferation and apoptosis in renal cell carcinoma [J]. *Oncology letters*, 2018, 16(2): 2175-84.
- [111] F F, T S, T Z, et al. MiR-425-5p promotes invasion and metastasis of hepatocellular carcinoma cells through SCAI-mediated dysregulation of multiple signaling pathways [J]. *Oncotarget*, 2017, 8(19): 31745-57.
- [112] Y F Y, F M G, B S W, et al. MiR-425-5p promotes tumor progression via modulation of CYLD in gastric cancer [J]. *European review for medical and pharmacological sciences*, 2017, 21(9): 2130-6.
- [113] L S, R J, J L, et al. MicoRNA-425-5p is a potential prognostic biomarker for cervical cancer [J]. *Annals of clinical biochemistry*, 2017, 54(1): 127-33.
- [114] J Y Z, X P S, Y N L, et al. MicroRNA-425-5p promotes the development of prostate cancer via targeting forkhead box J3 [J]. *European review for medical and pharmacological sciences*, 2019, 23(2): 547-54.
- [115] Z Z, Y L, L F, et al. microRNA-425-5p is upregulated in human gastric cancer and contributes to invasion and metastasis and [J]. *Experimental and therapeutic medicine*, 2015, 9(5): 1617-22.
- [116] M C, A A D, S S, et al. MicroRNA-466 inhibits tumor growth and bone metastasis in prostate cancer by direct regulation of osteogenic transcription factor RUNX2 [J]. *Cell death & disease*, 2017, 8(1): e2572.
- [117] W C, L F, S T, et al. MicroRNA-466 inhibits osteosarcoma cell proliferation and induces apoptosis by targeting CCND1 [J]. *Experimental and therapeutic medicine*, 2018, 16(6): 5117-22.
- [118] F T, Y Y, H P, et al. MicroRNA-466 (miR-466) functions as a tumor suppressor and prognostic factor in colorectal cancer (CRC) [J]. *Bosnian journal of basic medical sciences*, 2018, 18(3): 252-9.

- [119] P S, Y S, JM G, et al. A New MicroRNA Expression Signature for Cervical Cancer [J]. *International journal of gynecological cancer : official journal of the International Gynecological Cancer Society*, 2017, 27(2): 339-43.
- [120] L W, B L, L Z, et al. miR-664a-3p functions as an oncogene by targeting Hippo pathway in the development of gastric cancer [J]. *Cell proliferation*, 2019, undefined(undefined): e12567.
- [121] A K, N P, M A, et al. Antiproliferative and Pro-Apoptotic Effects of MiR-4286 Inhibition in Melanoma Cells [J]. *PloS one*, 2016, 11(12): e0168229.
- [122] H X, C W, Z L. miR-196a-5p promotes metastasis of colorectal cancer via targeting I $\kappa$ B $\alpha$  [J]. *BMC cancer*, 2019, 19(1): 30.
- [123] MH C, Y Y, J K, et al. miR-550a-3-5p acts as a tumor suppressor and reverses BRAF inhibitor resistance through the direct targeting of YAP [J]. *Cell death & disease*, 2018, 9(6): 640.
- [124] Y L, XL Z, XF L, et al. miR-212-3p reduced proliferation, and promoted apoptosis of fibroblast-like synoviocytes via down-regulating SOX5 in rheumatoid arthritis [J]. *European review for medical and pharmacological sciences*, 2018, 22(2): 461-71.
- [125] H L, C L, C S, et al. MiR-212-3p inhibits glioblastoma cell proliferation by targeting SGK3 [J]. *Journal of neuro-oncology*, 2015, 122(3): 431-9.
- [126] Y S, X Y, R D, et al. miR-130b-3p inhibits cell invasion and migration by targeting the Notch ligand Delta-like 1 in breast carcinoma [J]. *Gene*, 2017, 609(undefined): 80-7.
- [127] M D, KV G, Y T, et al. Plasma exosomal miRNAs-based prognosis in metastatic kidney cancer [J]. *Oncotarget*, 2017, 8(38): 63703-14.
- [128] Y G, R C, C Z, et al. miR-132-3p boosts caveolae-mediated transcellular transport in glioma endothelial cells by targeting PTEN/PI3K/PKB/Src/Cav-1 signaling pathway [J]. *FASEB journal : official publication of the Federation of American Societies for Experimental Biology*, 2019, 33(1): 441-54.
- [129] P Z, C F, J D, et al. Association of miR-1247-5p expression with clinicopathological parameters and prognosis in breast cancer [J]. *International journal of experimental pathology*, 2018, 99(4): 199-205.
- [130] B Z, Y L, Y F, et al. Downregulated miR-1247-5p associates with poor prognosis and facilitates tumor cell growth via DVL1/Wnt/ $\beta$ -catenin signaling in breast cancer [J]. *Biochemical and biophysical research communications*, 2018, 505(1): 302-8.
- [131] Y C, W F, W G, et al. miR-1247-5p functions as a tumor suppressor in human hepatocellular carcinoma by targeting Wnt3 [J]. *Oncology reports*, 2017, 38(1): 343-51.
- [132] J P, F J, J Z, et al. HSP90: A Novel Target Gene of miRNA-628-3p in A549 Cells [J]. *BioMed research international*, 2018, 2018(undefined): 4149707.
- [133] L C, X J, H C, et al. microRNA-628 inhibits the proliferation of acute myeloid leukemia cells by directly targeting IGF-1R [J]. *OncoTargets and therapy*, 2019, 12(undefined): 907-19.
